# Supplementary material for: Comprehensive analysis of tumor necrosis factor receptor TNFRSF9 (4-1BB) DNA methylation with regard to molecular and clinicopathological features, immune infiltrates, and response prediction to immunotherapy in melanoma
Source: PubMed Central journal article supplement — eBioMedicine. 2020 Feb 3;52:102647. doi: 10.1016/j.ebiom.2020.102647 (PMC6997575; doi:10.1016/j.ebiom.2020.102647), 2020-02-03
Supplement: mmc2.pdf [file mmc2.pdf]

**Supplemental Table 2: Correlation of *TNFRSF9* methylation with *TNFRSF9* mRNA expression with regard to tumor tissue type.** Spearman's rank correlations of *TNFRSF9* methylation and mRNA expression in melanoma patients stratified according to the stage (all sites:  $N = 468$ , primary tumor:  $N = 102$ , regional lymph node metastases:  $N = 221$ , distant metastases:  $N = 68$ , regional cutaneous or subcutaneous tissue:  $N = 74$ , missing information:  $N = 3$ ). Significant features are shown in boldface.

| Analyte    | CpG site no. | All Sites         |                  | Primary Tumors    |                  | Regional Lymph Nodes |                  | Distant Metastases |                  | Regional Cutaneous or Subcutaneous Tissues |                  |
|------------|--------------|-------------------|------------------|-------------------|------------------|----------------------|------------------|--------------------|------------------|--------------------------------------------|------------------|
|            |              | Spearman's $\rho$ | <i>P</i> -Value  | Spearman's $\rho$ | <i>P</i> -Value  | Spearman's $\rho$    | <i>P</i> -Value  | Spearman's $\rho$  | <i>P</i> -Value  | Spearman's $\rho$                          | <i>P</i> -Value  |
| cg16839093 | 1            | 0.06              | 0.23             | 0.09              | 0.38             | 0.09                 | 0.21             | 0.03               | 0.81             | -0.19                                      | 0.11             |
| cg27305704 | 2            | 0.01              | 0.89             | 0.08              | 0.44             | 0.09                 | 0.18             | -0.06              | 0.63             | <b>-0.26</b>                               | <b>0.024</b>     |
| cg18859763 | 3            | -0.06             | 0.22             | 0.05              | 0.65             | -0.05                | 0.46             | -0.08              | 0.53             | <b>-0.24</b>                               | <b>0.039</b>     |
| cg07836592 | 4            | -0.01             | 0.91             | 0.07              | 0.52             | 0.09                 | 0.21             | -0.00              | 0.99             | <b>-0.28</b>                               | <b>0.015</b>     |
| cg23959705 | 5            | <b>0.10</b>       | <b>0.025</b>     | 0.07              | 0.51             | <b>0.20</b>          | <b>0.004</b>     | 0.06               | 0.60             | -0.14                                      | 0.23             |
| cg06956444 | 6            | <b>-0.47</b>      | <b>&lt;0.001</b> | <b>-0.49</b>      | <b>&lt;0.001</b> | <b>-0.38</b>         | <b>&lt;0.001</b> | <b>-0.58</b>       | <b>&lt;0.001</b> | <b>-0.54</b>                               | <b>&lt;0.001</b> |
| cg14614416 | 7            | <b>-0.32</b>      | <b>&lt;0.001</b> | <b>-0.21</b>      | <b>0.034</b>     | <b>-0.22</b>         | <b>0.001</b>     | <b>-0.49</b>       | <b>&lt;0.001</b> | <b>-0.42</b>                               | <b>&lt;0.001</b> |
| cg18025409 | 8            | <b>-0.19</b>      | <b>&lt;0.001</b> | -0.10             | 0.34             | -0.03                | 0.70             | <b>-0.44</b>       | <b>&lt;0.001</b> | <b>-0.44</b>                               | <b>&lt;0.001</b> |
| cg14153654 | 9            | -0.02             | 0.62             | 0.07              | 0.50             | 0.05                 | 0.45             | <b>-0.29</b>       | <b>0.018</b>     | <b>-0.23</b>                               | <b>0.045</b>     |
| cg08840010 | 10           | <b>-0.27</b>      | <b>&lt;0.001</b> | <b>-0.22</b>      | <b>0.027</b>     | <b>-0.19</b>         | <b>0.004</b>     | <b>-0.49</b>       | <b>&lt;0.001</b> | <b>-0.52</b>                               | <b>&lt;0.001</b> |
| cg17123655 | 11           | <b>-0.32</b>      | <b>&lt;0.001</b> | <b>-0.37</b>      | <b>&lt;0.001</b> | <b>-0.26</b>         | <b>&lt;0.001</b> | <b>-0.45</b>       | <b>&lt;0.001</b> | <b>-0.37</b>                               | <b>0.001</b>     |
| cg16117781 | 12           | <b>-0.43</b>      | <b>&lt;0.001</b> | <b>-0.28</b>      | <b>0.004</b>     | <b>-0.43</b>         | <b>&lt;0.001</b> | <b>-0.52</b>       | <b>&lt;0.001</b> | <b>-0.36</b>                               | <b>0.001</b>     |

NA: Not Applicable
