# Supplementary material for: Comprehensive analysis of tumor necrosis factor receptor TNFRSF9 (4-1BB) DNA methylation with regard to molecular and clinicopathological features, immune infiltrates, and response prediction to immunotherapy in melanoma
Source: PubMed Central journal article supplement — eBioMedicine. 2020 Feb 3;52:102647. doi: 10.1016/j.ebiom.2020.102647 (PMC6997575; doi:10.1016/j.ebiom.2020.102647), 2020-02-03
Supplement: mmc3.pdf [file mmc3.pdf]

**Supplemental Table 3: Correlation of *TNFRSF9* methylation and mRNA expression with lymphocyte score and with regard to tumor tissue type.**

Spearman's rank correlations of *TNFRSF9* methylation and mRNA expression with lymphocyte score in melanoma patients stratified according to the stage (all sites/mRNA:  $N = 328$ , all sites/methylation:  $N = 329$ , primary tumor/mRNA:  $N = 65$ , primary tumor/methylation:  $N = 66$ , regional lymph node metastases:  $N = 165$ , distant metastases:  $N = 35$ , regional cutaneous or subcutaneous tissue:  $N = 61$ , missing information:  $N = 2$ ). Significant features are shown in boldface.

| Analyte           | CpG site no. | All Sites         |                  | Primary Tumors    |                 | Regional Lymph Nodes |                  | Distant Metastases |                 | Regional Cutaneous or Subcutaneous Tissues |                 |
|-------------------|--------------|-------------------|------------------|-------------------|-----------------|----------------------|------------------|--------------------|-----------------|--------------------------------------------|-----------------|
|                   |              | Spearman's $\rho$ | <i>P</i> -Value  | Spearman's $\rho$ | <i>P</i> -Value | Spearman's $\rho$    | <i>P</i> -Value  | Spearman's $\rho$  | <i>P</i> -Value | Spearman's $\rho$                          | <i>P</i> -Value |
| <i>mRNA</i>       | NA           | <b>0.51</b>       | <b>&lt;0.001</b> | 0.20              | 0.12            | <b>0.57</b>          | <b>&lt;0.001</b> | <b>0.52</b>        | <b>0.001</b>    | <b>0.38</b>                                | <b>0.003</b>    |
| <i>cg16839093</i> | 1            | 0.08              | 0.13             | <b>0.36</b>       | <b>0.003</b>    | 0.07                 | 0.40             | 0.08               | 0.63            | <b>-0.26</b>                               | <b>0.043</b>    |
| <i>cg27305704</i> | 2            | -0.07             | 0.21             | <b>0.26</b>       | <b>0.033</b>    | -0.08                | 0.29             | -0.02              | 0.90            | <b>-0.27</b>                               | <b>0.037</b>    |
| <i>cg18859763</i> | 3            | -0.02             | 0.67             | 0.15              | 0.24            | -0.06                | 0.43             | -0.10              | 0.59            | -0.07                                      | 0.57            |
| <i>cg07836592</i> | 4            | -0.03             | 0.58             | 0.07              | 0.57            | -0.03                | 0.74             | 0.24               | 0.17            | -0.11                                      | 0.40            |
| <i>cg23959705</i> | 5            | <b>0.14</b>       | <b>0.012</b>     | 0.24              | 0.051           | 0.10                 | 0.20             | 0.05               | 0.80            | 0.11                                       | 0.40            |
| <i>cg06956444</i> | 6            | <b>-0.31</b>      | <b>&lt;0.001</b> | -0.15             | 0.24            | <b>-0.31</b>         | <b>&lt;0.001</b> | <b>-0.37</b>       | <b>0.031</b>    | <b>-0.27</b>                               | <b>0.038</b>    |
| <i>cg14614416</i> | 7            | <b>-0.22</b>      | <b>&lt;0.001</b> | -0.24             | 0.052           | -0.14                | 0.070            | -0.33              | 0.051           | -0.14                                      | 0.28            |
| <i>cg18025409</i> | 8            | -0.04             | 0.44             | 0.16              | 0.21            | 0.01                 | 0.89             | -0.20              | 0.25            | -0.09                                      | 0.49            |
| <i>cg14153654</i> | 9            | 0.07              | 0.20             | 0.19              | 0.13            | 0.11                 | 0.18             | -0.15              | 0.38            | -0.03                                      | 0.84            |
| <i>cg08840010</i> | 10           | <b>-0.23</b>      | <b>&lt;0.001</b> | -0.04             | 0.77            | <b>-0.20</b>         | <b>0.012</b>     | <b>-0.39</b>       | <b>0.020</b>    | <b>-0.29</b>                               | <b>0.024</b>    |
| <i>cg17123655</i> | 11           | <b>-0.18</b>      | <b>0.001</b>     | -0.02             | 0.89            | <b>-0.16</b>         | <b>0.041</b>     | -0.27              | 0.11            | -0.22                                      | 0.091           |
| <i>cg16117781</i> | 12           | <b>-0.23</b>      | <b>&lt;0.001</b> | 0.06              | 0.63            | <b>-0.31</b>         | <b>&lt;0.001</b> | <b>-0.34</b>       | <b>0.044</b>    | 0.00                                       | 1.0             |

NA: Not Applicable
