# Supplementary material for: Comprehensive analysis of tumor necrosis factor receptor TNFRSF9 (4-1BB) DNA methylation with regard to molecular and clinicopathological features, immune infiltrates, and response prediction to immunotherapy in melanoma
Source: PubMed Central journal article supplement — eBioMedicine. 2020 Feb 3;52:102647. doi: 10.1016/j.ebiom.2020.102647 (PMC6997575; doi:10.1016/j.ebiom.2020.102647), 2020-02-03
Supplement: mmc4.pdf [file mmc4.pdf]

**Supplemental Table 4:** Association of *TNFRSF9* methylation and mRNA expression with overall survival with regard to tissue type. Cox proportional hazard analyses of overall survival and *TNFRSF9* methylation and mRNA expression in melanoma patients stratified according the tumor tissue type (all sites:  $N = 470$ , primary tumor:  $N = 103$ , regional lymph node metastases:  $N = 222$ , distant metastases:  $N = 68$ , regional cutaneous or subcutaneous tissue:  $N = 74$ , missing information:  $N = 3$ ). *TNFRSF9* mRNA expression was analyzed as log<sub>2</sub>-transformed variable. Significant features are shown in boldface. *P*-values refer to Wald test.

| Analyte     | CpG site no. | All Sites               |                 | Primary Tumors                                      |                 | Regional Lymph Nodes    |                  | Distant Metastases      |                 | Regional Cutaneous or Subcutaneous Tissues |                 |
|-------------|--------------|-------------------------|-----------------|-----------------------------------------------------|-----------------|-------------------------|------------------|-------------------------|-----------------|--------------------------------------------|-----------------|
|             |              | Hazard Ratio [95% CI]   | <i>P</i> -Value | Hazard Ratio [95% CI]                               | <i>P</i> -Value | Hazard Ratio [95% CI]   | <i>P</i> -Value  | Hazard Ratio [95% CI]   | <i>P</i> -Value | Hazard Ratio [95% CI]                      | <i>P</i> -Value |
| <i>mRNA</i> | NA           | <b>0.92 [0.87-0.97]</b> | <b>0.002</b>    | 1.07 [0.79-1.44]                                    | 0.68            | <b>0.87 [0.80-0.94]</b> | <b>&lt;0.001</b> | 0.92 [0.82-1.02]        | 0.11            | 1.00 [0.87-1.16]                           | 0.98            |
| cg16839093  | 1            | 0.20 [0.03-1.33]        | 0.096           | 39.4 [0-9.3x10 <sup>8</sup> ]                       | 0.67            | 0.08 [0.00-1.59]        | 0.097            | 3.05 [0.11-83.7]        | 0.51            | 0.23 [0.01-10.6]                           | 0.45            |
| cg27305704  | 2            | 0.69 [0.31-1.53]        | 0.36            | 4.34 [0.11-172]                                     | 0.43            | 0.47 [0.14-1.63]        | 0.24             | 1.45 [0.33-6.41]        | 0.62            | 0.73 [0.13-4.00]                           | 0.72            |
| cg18859763  | 3            | 0.51 [0.15-1.76]        | 0.29            | 2.0x10 <sup>4</sup> [0-3.9x10 <sup>11</sup> ]       | 0.25            | 0.33 [0.04-2.52]        | 0.29             | 1.81 [0.19-17.3]        | 0.61            | 0.53 [0.05-5.82]                           | 0.60            |
| cg07836592  | 4            | 0.47 [0.15-1.53]        | 0.21            | <b>7.4x10<sup>7</sup> [7.9-6.9x10<sup>14</sup>]</b> | <b>0.027</b>    | 0.36 [0.07-1.93]        | 0.23             | 2.96 [0.23-38.5]        | 0.41            | 0.46 [0.04-5.43]                           | 0.54            |
| cg23959705  | 5            | 0.59 [0.17-2.10]        | 0.42            | 4.86 [0.01-3.4 x10 <sup>3</sup> ]                   | 0.64            | 0.32 [0.04-2.52]        | 0.28             | 2.20 [0.26-18.4]        | 0.47            | 0.57 [0.04-8.09]                           | 0.67            |
| cg06956444  | 6            | <b>3.42 [1.28-9.14]</b> | <b>0.014</b>    | 6.10 [0.06-682]                                     | 0.45            | 2.98 [0.73-12.1]        | 0.13             | 1.93 [0.33-11.4]        | 0.47            | 10.1 [0.71-144]                            | 0.089           |
| cg14614416  | 7            | <b>6.28 [2.06-19.2]</b> | <b>0.001</b>    | 1.6 x10 <sup>3</sup> [0.49-5.4 x10 <sup>6</sup> ]   | 0.074           | <b>8.30 [1.71-40.3]</b> | <b>0.009</b>     | 8.32 [0.92-75.2]        | 0.059           | 0.43 [0.03-5.81]                           | 0.52            |
| cg18025409  | 8            | 1.80 [0.84-3.85]        | 0.13            | 6.18 [0.42-90.9]                                    | 0.18            | 1.41 [0.48-4.11]        | 0.53             | <b>4.62 [1.05-20.4]</b> | <b>0.043</b>    | 1.03 [0.13-8.30]                           | 0.98            |
| cg14153654  | 9            | <b>3.03 [1.01-9.07]</b> | <b>0.048</b>    | 13.8 [0.46-413]                                     | 0.13            | 1.65 [0.36-7.68]        | 0.52             | <b>18.0 [1.68-192]</b>  | <b>0.017</b>    | 1.65 [0.07-39.6]                           | 0.76            |
| cg08840010  | 10           | <b>2.85 [1.23-6.63]</b> | <b>0.015</b>    | 13.8 [0.17-1.1x10 <sup>4</sup> ]                    | 0.24            | <b>3.78 [1.21-11.8]</b> | <b>0.022</b>     | 5.11 [0.71-36.7]        | 0.11            | 0.84 [0.10-7.26]                           | 0.88            |
| cg17123655  | 11           | <b>3.89 [1.25-12.1]</b> | <b>0.019</b>    | 12.9 [0.02-8.1x10 <sup>4</sup> ]                    | 0.44            | 4.61 [0.97-21.8]        | 0.054            | <b>18.4 [1.17-292]</b>  | <b>0.039</b>    | 0.22 [0.02-3.23]                           | 0.27            |
| cg16117781  | 12           | <b>3.57 [1.65-7.76]</b> | <b>0.001</b>    | 3.80 [0.03-453]                                     | 0.58            | <b>2.93 [1.05-8.14]</b> | <b>0.039</b>     | <b>13.8 [1.75-109]</b>  | <b>0.013</b>    | 1.64 [0.28-9.52]                           | 0.58            |

NA: Not Applicable
